# Supplementary material for: Green Spaces, Land Cover, Street Trees and Hypertension in the Megacity of São Paulo
Source: PubMed Central journal article supplement (PMC7038323; doi:10.3390/ijerph17030725), 2020-01-22
Supplement: ijerph-17-00725-s001.pdf [file ijerph-17-00725-s001.pdf]

1 **Supplementary material**

2 *Elsa-Brasil Cohort description*

3 The Longitudinal Study of Adult Health - ELSA Brazil - is a multicenter cohort  
4 investigation composed of 15,000 employees from six public higher education and  
5 research institutions in the Northeast, South and Southeast of Brazil. The aim is to  
6 investigate the incidence and risk factors for chronic diseases, in particular cardiovascular  
7 diseases and diabetes.

8 In each center of the study, the studied population - aged 35 to 74 years - take exams and  
9 interviews about as living conditions, social differences, and work relationship, gender  
10 and diet habits. In addition to fostering the development of new investigations, the study  
11 will be fundamental for adapting public health policies to national needs. The RMSP  
12 study has 5061 volunteers aged 35 to 74 years old who are all employees of the University  
13 of São Paulo, followed since 2008. The ELSA coordination in the state of São Paulo is  
14 under the responsibility of Paulo Andrade Lotufo and Vice-Coordinator of Isabela Judith  
15 Martins Benseñor. In São Paulo, the ELSA Research Center (CI - SP) is located at the  
16 University Hospital of the University of São Paulo (USP), located at Av. Lineu Prestes,  
17 2565 - University City - ZIP Code 05508-900 - São Paulo - SP, see  
18 <http://www.elsa.org.br/objetivos.html>.

19 More information can be found at:

- 20 • Aquino, E. M., Barreto, S. M., Benseñor, I. M., Carvalho, M. S., Chor, D.,  
21 Duncan, B. B., ... & Azeredo Passos, V. M. (2012). Brazilian longitudinal study  
22 of adult health (ELSA-Brasil): objectives and design. *American journal of  
23 epidemiology*, 175(4), 315-324.
- 24 • Bastos, M. S., Lotufo, P. A., Whitaker, A. L., & Benseñor, I. M. (2012).  
25 Validation of the short-version of Rose Angina Questionnaire in Brazil. *Arquivos  
26 brasileiros de cardiologia*, 99(5), 1056-1059.
- 27 • Lotufo, P. A. (2013). Setting up the longitudinal study for adult health (ELSA-  
28 Brasil). *Revista de saude publica*, 47, 3-9.
- 29 • Schmidt, M. I., Duncan, B. B., Mill, J. G., Lotufo, P. A., Chor, D., Barreto, S. M.,  
30 ... & Carvalho, M. S. (2014). Cohort profile: longitudinal study of adult health  
31 (ELSA-Brasil). *International journal of epidemiology*, 44(1), 68-75.

32

33

34 *Results*

35 Descriptive statistics (means, SDs, percentages) were firstly calculated to describe and  
 36 summarize the variables used in this study. Table S1 shows the proportions of land cover  
 37 variables and number of street trees in the 300m buffers, 96 city district and 32 regional  
 38 government boundaries.

39

40 Table S1. descriptive statistics – Mean (%), standard deviation (%SD), minimum (%) e  
 41 maximum (%) land cover classes of 300 m buffers, districts and regional government  
 42 boundaries

|                                   |                | Street trees (n) | Treetop (%) | Grass (%) | Green spaces (%) | Soil (%) | River/lake (%) | Swimming pool (%) | White roof (%) | Dark roof (%) | Gray roof (%) | Ceramic roof (%) | Roofs (%) |
|-----------------------------------|----------------|------------------|-------------|-----------|------------------|----------|----------------|-------------------|----------------|---------------|---------------|------------------|-----------|
| <b>300 m Buffer</b>               | <b>Mean</b>    | 267              | 21.87       | 3.69      | 26.07            | 0.66     | 0.04           | 0.00              | 1.31           | 15.02         | 3.31          | 22.79            | 42.80     |
|                                   | <b>SD</b>      | 137              | 10.60       | 3.81      | 12.47            | 0.74     | 1.25           | 0.18              | 1.30           | 8.97          | 3.89          | 8.40             | 12.08     |
|                                   | <b>Minimum</b> | 3                | 0.00        | 0.00      | 0.01             | 0.00     | 0.00           | 0.00              | 0.00           | 0.01          | 0.00          | 0.01             | 0.02      |
|                                   | <b>Maximum</b> | 899              | 74.01       | 64.27     | 83.17            | 18.42    | 34.52          | 8.09              | 3.55           | 72.70         | 46.09         | 50.41            | 85.08     |
| <b>District (n = 96)</b>          | <b>Mean</b>    | 14317            | 23.49       | 6.52      | 30.01            | 0.38     | 1.78           | 0.17              | 1.44           | 18.69         | 2.42          | 20.40            | 42.95     |
|                                   | <b>SD</b>      | 16231            | 11.62       | 5.82      | 17.44            | 0.33     | 4.35           | 0.65              | 0.70           | 10.17         | 2.45          | 6.18             | 13.58     |
|                                   | <b>Minimum</b> | 1290             | 4.97        | 0.95      | 5.92             | 0.01     | 0.01           | 0.00              | 0.11           | 0.44          | 0.30          | 7.46             | 10.69     |
|                                   | <b>Maximum</b> | 59475            | 56.83       | 27.52     | 84.35            | 1.47     | 22.75          | 5.90              | 4.06           | 42.35         | 17.57         | 35.72            | 67.91     |
| <b>Regional government (n=32)</b> | <b>Mean</b>    | 39508            | 23.68       | 4.98      | 28.66            | 8.52     | 4.60           | 0.33              | 1.84           | 15.91         | 2.49          | 3.74             | 23.98     |
|                                   | <b>SD</b>      | 13609            | 16.52       | 2.85      | 19.37            | 1.79     | 2.81           | 0.70              | 0.68           | 5.64          | 0.77          | 1.40             | 6.12      |
|                                   | <b>Minimum</b> | 3520             | 6.20        | 2.00      | 8.20             | 4.03     | 1.43           | 0.06              | 0.81           | 2.20          | 0.77          | 2.00             | 9.08      |
|                                   | <b>Maximum</b> | 88721            | 69.60       | 13.18     | 82.79            | 11.98    | 14.61          | 3.01              | 3.55           | 25.74         | 4.13          | 6.25             | 34.03     |

43

44

45

46

47

48

49

50

51

52

53

54

55 To analyze park distance, we considered the 3 parks (Table S2) closest from the  
 56 participants' homes. The mean distance to the closest park was 1294.86 meters and the  
 57 mean distance to the 3rd closest park was 2389 m. the participant living closest from the  
 58 park is 37.07 m away and the thither is 11695.85 m.

59

60 Table S2. Descriptive statistic of proximity (meters) of tree closest park (N = 3418)

61

|         | Proximity from participant residence (m) |         |          |
|---------|------------------------------------------|---------|----------|
|         | Park 1                                   | Park 2  | Park 3   |
| Mean    | 1294.86                                  | 1909.57 | 2389     |
| SD      | 717.22                                   | 905.07  | 944.53   |
| Minimum | 37.07                                    | 137.09  | 141.86   |
| Maximum | 6571.22                                  | 11400.4 | 11695.85 |

62

63 Table S3. Sensibility analyses (regression models). Odds ratios (and 95% confidence  
 64 intervals) for the association between hypertension diagnosis, land cover and green  
 65 space variables using individual income groups.

66

|                                    | Individual income | Crude                      | Model 1 adjusted         | Model 2 adjusted   |
|------------------------------------|-------------------|----------------------------|--------------------------|--------------------|
|                                    |                   | OD (CI)                    | OD (CI)                  | OD (CI)            |
| Street trees government boundaries | low income        | <b>0.86 (0.79-0.95)**</b>  | <b>0.87 (0.79-0.97)*</b> | 0.90 (0.81 - 1.01) |
|                                    | medium income     | 0.980 (0.937 to 1.024)     | 0.95 (0.87 - 1.03)       | 0.93 (0.85 - 1.02) |
|                                    | high income       | 0.95 (0.86-1.05)           | 0.95 (0.85 - 1.06)       | 0.94 (0.84 - 1.06) |
| Parks less 1 Km                    | low income        | 0.84 (0.68 - 1.04)         | 0.79 0.63 - 1.00         | 0.83 0.65 - 1.07   |
|                                    | medium income     | 1.01 (0.85 - 1.20)         | 1.02 0.84 - 1.22         | 0.96 0.78 - 1.18   |
|                                    | high income       | 0.86 (0.71 - 1.04)         | 0.88 0.72 - 1.07         | 0.86 (0.69 - 1.07) |
| Roofs                              | low income        | <b>1.01 (1.00 - 1.02)*</b> | 1.00 (0.99 - 1.02)       | 1.00 (0.99 - 1.02) |
|                                    | medium income     | 1.00 0.99 - 1.01           | 0.99 (0.98 - 1.00)       | 0.99 (0.98 - 1.00) |
|                                    | high income       | 1.00 (0.99 - 1.01)         | 1.00 (0.99 - 1.02)       | 1.01 (0.99 - 1.02) |

67

68 Model 1 is adjusted for age, sex, race and educational level. Model 2 is adjusted for age,  
 69 sex, race, educational level, smoking habits, body mass index, excessive drinking, salt  
 70 consumption, physical activity, dyslipidemia diagnoses and diabetes diagnoses. Signif.  
 71 codes: '\*\*\*' 0.001 '\*\*' 0.01 '\*' 0.05 ' ' ' 0.1.

72

73 Table S4. Sensibility analyses (regression models). Odds ratios (and 95% confidence  
 74 intervals) for the association between hypertension diagnosis, land cover and green  
 75 space variables using HDI government boundaries groups.

76

|                                          | IDH                 | Crude<br>OD (CI)            | Model 1 adjusted<br>OD (CI) | Model 2 adjusted<br>OD (CI) |
|------------------------------------------|---------------------|-----------------------------|-----------------------------|-----------------------------|
| Street trees<br>government<br>boundaries | > 0.800 ( High)     | 0.98 (0.91 - 1.04)          | 0.97 (0.90 - 1.05)          | 0.96 (0.89 - 1.04)          |
|                                          | < 0.800<br>(Medium) | 0.86 (0.69 - 1.07)          | 0.81 (0.64 - 1.03)          | 0.83 (0.65 - 1.07)          |
| Parks less 1<br>Km                       | > 0.800 ( High)     | 0.91 (0.81 - 1.03)          | 0.90 (0.79 - 1.03)          | 0.89 (0.77 - 1.02)          |
|                                          | < 0.800<br>(Medium) | 1.03 (0.79 - 1.34)          | 0.94 (0.70 - 1.26)          | 0.97 (0.71 - 1.32)          |
| Roofs                                    | > 0.800 ( High)     | 0.99 (0.98 - 1.00)          | 0.99 (0.98 - 1.00)          | 0.99 (0.98 - 1.00)          |
|                                          | < 0.800<br>(Medium) | <b>1.01 (1.00 - 1.02 )*</b> | 1.00 (0.99 - 1.02)          | 1.01 (0.99 - 1.02)          |

77

78 Model 1 is adjusted for age, sex, race and educational level. Model 2 is adjusted for age,  
 79 sex, race, educational level, smoking habits, body mass index, excessive drinking, salt  
 80 consumption, physical activity, dyslipidemia diagnoses and diabetes diagnoses. Signif.  
 81 codes: '\*\*\*' 0.001 '\*\*' 0.01 '\*' 0.05 ' ' ' 0.1.

82
